# Supplementary material for: Development and validation of a one-step SMN assay for genetic testing in spinal muscular atrophy via MALDI-TOF MS
Source: Royal Society of Chemistry journal article supplement (doi:10.1039/d4an01225a), 2024-11-25
Supplement: d4an01225a1.pdf [file d4an01225a1.pdf]

## Development and validation of a one-step *SMN* assay for genetic testing in spinal muscular atrophy via MALDI-TOF MS

### 1. Supplementary Tables

**Table S1** Amplification primers for *SMN* copy number quantification by MALDI-TOF MS

| Primers            | Sequence                                                                                                                                                      |
|--------------------|---------------------------------------------------------------------------------------------------------------------------------------------------------------|
| <i>SMN</i> exon7_F | ACGTTGGATGCTTCCTTATTTTCCTTAC                                                                                                                                  |
| <i>SMN</i> exon7_R | ACGTTGGATGAATGCTGGCAGACTTACTCC                                                                                                                                |
| <i>SMN</i> exon8_F | ACGTTGGATGGGACTCTATTTTGAAAACC                                                                                                                                 |
| <i>SMN</i> exon8_R | ACGTTGGATGTTTCTCAACTGCCTCACCAC                                                                                                                                |
| <i>RPPHI</i> _F    | ACGTTGGATGTGTCAGTAGGCGGGAACAC                                                                                                                                 |
| <i>RPPHI</i> _R    | ACGTTGGATGAAATATTGCAGGGCGCCAC                                                                                                                                 |
| <i>SMN</i> exon7_C | CTTCCTTATTTTCCTTACAGGGTTT <b>G</b> AGACAAAATCAAAAAGAA<br>GGAAGGTGCTCACATTCCTTAAATTAAGGAGTAAGTCTGCCAGCA<br>GGACTCTATTTTGAAAACCATCTGTAAGACTG <b>C</b> GGTGGGGGT |
| <i>SMN</i> exon8_C | GGGAGGCCAGCACGGTGGTGAGGCAGTTGAGAAA                                                                                                                            |
| <i>RPPHI</i> _C    | AAATATTGCAGGGCGCCACTCCCCTGTCCCTCACAGCCATCTTCCT<br>GCCAGGGCG <b>G</b> ACGCGCGCTGGGTGTTCCCGCTAGTGACA                                                            |

Note: *RPPHI* was used as an internal calibration in the panel of *SMN* copy number. *SMN*: survival motor neuron.

**Table S2** Extension primers for *SMN* copy number quantification by MALDI-TOF MS

| Primers            | Sequence              |
|--------------------|-----------------------|
| <i>SMN</i> exon7_E | TTATTTTCCTTACAGGGTTT  |
| <i>SMN</i> exon8_E | GTGCTGGCCTCCCACCCCACC |
| <i>RPPHI</i> _E    | GAACACCCAGCGCGCGT     |

Note: *RPPHI* was used as an internal calibration in the panel of *SMN* copy number. *SMN*: survival motor neuron.

**Table S3** Amplification primers for *SMN* pathogenic variant detection by MALDI-TOF MS

| Primers            | Sequence                         |
|--------------------|----------------------------------|
| T835-5G_F          | ACGTTGGATGGCTATTTTTTTTAACTTCC    |
| T835-5G_R          | ACGTTGGATGCATTAACCTTTCAACTTTT    |
| 27706-27707delAT_F | ACGTTGGATGGGAAGTGGAAATGGGTAAGTCC |
| 27706-27707delAT_R | ACGTTGGATGCCCCAGTCTTTTACAGATG    |
| C689T_F            | ACGTTGGATGGGTCTAAAATTCAATGGCCC   |
| C689T_R            | ACGTTGGATGTGGTGGTCCAGAAGGAAATG   |
| T683A_F            | ACGTTGGATGGGTCTAAAATTCAATGGCCC   |
| T683A_R            | ACGTTGGATGTGGTGGTCCAGAAGGAAATG   |
| G400A_F            | ACGTTGGATGGTGGTTTACACTGGATATGG   |
| G400A_R            | ACGTTGGATGGTCTCTGCTTCCAGAAATTG   |
| T27134G_F          | ACGTTGGATGGCTATTTTTTTTAACTTCC    |
| T27134G_R          | ACGTTGGATGCATTAACCTTTCAACTTTT    |

|          |                                |
|----------|--------------------------------|
| G863T_F  | ACGTTGGATGGCTATTTTTTTTAACTTCC  |
| G863T_R  | ACGTTGGATGCATTAACCTTTCAACTTTT  |
| 22dupA_F | ACGTTGGATGTTTGCTATGGCGATGAGCAG |
| 22dupA_R | ACGTTGGATGCTAATAGGGAGACTGCACTG |
| A815G_F  | ACGTTGGATGGATGCTGATGCTTTGGGAAG |
| A815G_R  | ACGTTGGATGGTCAGGAAAAGATGCTGAG  |

*SMN*: survival motor neuron.

**Table S4** Extension primers for *SMN* pathogenic variant detection by MALDI-TOF MS

| Primers            | Sequence                 |
|--------------------|--------------------------|
| T835-5G_E          | ACTTCCTTTATTTTCCT        |
| 27706-27707delAT_E | ATATTTTACTGGACTCT        |
| C689T_E            | ATGGAGGCAGCCAGCAT        |
| T683A_E            | CCACCACCACCACCCCACT      |
| G400A_E            | ATCGGACAGATTTTGCTCCT     |
| T27134G_E          | TTAACATCTGAACTTTTTAA     |
| G863T_E            | TAATTTAAGGAATGTGAGCAC    |
| 22dupA_E           | TGCTCCGGGACGCCGCCACCACT  |
| A815G_E            | CTTACCATATAATAGCCAGTATGA |

*SMN*: survival motor neuron.

**Table S5** Comparative analysis of *SMN* copy numbers in 13 DNA samples between MALDI-TOF MS and MLPA.

| Copy Number      |                  | N        | MALDI-TOF MS      |           |                  |           | MLPA              |           |                  |           |  |
|------------------|------------------|----------|-------------------|-----------|------------------|-----------|-------------------|-----------|------------------|-----------|--|
| <i>SMN1:SMN2</i> | <i>SMN1:SMN2</i> |          | <i>SMN1: SMN2</i> |           | <i>SMN1:SMN2</i> |           | <i>SMN1: SMN2</i> |           | <i>SMN1:SMN2</i> |           |  |
| E7               | E8               |          | E7                | E8        | E7               | E8        | E7                | E8        | E7               | E8        |  |
| 2:0              | 2:0              | 1        | 1.67±0.09         | 0.00±0.01 | 2.08±0.30        | 0.03±0.03 | 2.44±0.12         | 0         | 2.34±0.12        | 0         |  |
| 2:1              | 2:1              | 3        | 1.97±0.04         | 1.10±0.13 | 1.86±0.04        | 1.00±0.01 | 2.09±0.07         | 1.06±0.02 | 2.00±0.07        | 1.08±0.02 |  |
| 2:2              | 2:2              | 5        | 2.00±0.18         | 2.03±0.27 | 2.03±0.08        | 2.01±0.13 | 2.09±0.05         | 1.99±0.05 | 2.02±0.09        | 2.02±0.04 |  |
| 2:3              | 2:3              | 1        | 1.91±0.05         | 2.66±0.14 | 1.71±0.12        | 2.53±0.15 | 1.96±0.10         | 3.14±0.16 | 1.86±0.10        | 2.62±0.14 |  |
| 0:3              | 0:3              | NA03813* | 0.01±0.01         | 2.97±0.04 | 0                | 2.54±0.04 | 0                 | 3         | 0                | 3         |  |
| 1:5              | 1:5              | NA03814* | 1.26±0.08         | 4.4±0.90  | 1.05±0.04        | 4.93±0.30 | 1                 | 5         | 1                | 5         |  |
| 3:2              | 3:2              | NA12548* | 2.61±0.26         | 1.83±0.24 | 2.70±0.19        | 1.89±0.11 | 3                 | 2         | 3                | 2         |  |
| Total            |                  | 13       |                   |           |                  |           |                   |           |                  |           |  |

\*Sample from Coriell biobank tested by MRC Holland with P021-B1 SMA for *SMN1* and *SMN2* copy number. The *SMN* copy number corresponding to Coriell DNA is provided in the kit instruction (P060-B2 SMA Carrier, P021-B1 SMA). MALDI-TOF MS, Matrix-assisted laser desorption/ionization time-of-flight mass spectrometry; MLPA, multiple ligation-dependent probe amplification; SMA, spinal muscular atrophy; *SMN*, survival motor neuron. SMA specifically denotes 5q SMA resulting from the pathogenic variation of *SMN1* located at 5q13.

**Table S6** Kappa consistency assessment for the detection of *SMN* copy number in 13 DNA samples

| Copy number     |   | MLPA |   |    |    |   |                | Total |
|-----------------|---|------|---|----|----|---|----------------|-------|
|                 |   | 0    | 1 | 2  | 3  | 4 | 5              |       |
| MALDI-TOF<br>MS | 0 | 4    | 0 | 0  | 0  | 0 | 0              | 4     |
|                 | 1 | 0    | 8 | 0  | 0  | 0 | 0              | 8     |
|                 | 2 | 0    | 0 | 31 | 1* | 0 | 0              | 32    |
|                 | 3 | 0    | 0 | 0  | 6  | 0 | 0              | 6     |
|                 | 4 | 0    | 0 | 0  | 0  | 0 | 1 <sup>Δ</sup> | 1     |
|                 | 5 | 0    | 0 | 0  | 0  | 0 | 1              | 1     |

|       |   |   |    |   |   |   |    |
|-------|---|---|----|---|---|---|----|
| Total | 4 | 8 | 31 | 7 | 0 | 2 | 52 |
|-------|---|---|----|---|---|---|----|

\*The copy number of *SMN1* E7 was determined to be 1.67±0.09 by MALDI-TOF MS and 2.44±0.12 by MLPA (gray value). The latter was classified as 3 copies in the kappa consistency test. ΔThe copy number of *SMN2* E7 was determined to be 4.4±0.90 by MALDI-TOF MS and 5 by MLPA. When conducting kappa tests, the total number of tests (total) was weighted on a case-by-case basis. The kappa value 0.935 (with a progressive standard error of 0.045, P < 0.001) suggests a strong agreement between the two test methods. MALDI-TOF MS, Matrix-assisted laser desorption/ionization time-of-flight mass spectrometry; MLPA: multiple ligation-dependent probe amplification; *SMN*: survival motor neuron.

**Table S7** Comparative assessment of *SMN* copy numbers in one clinical cohort between MALDI-TOF MS and MLPA.

| Copy Number      |                  |    | MALDI-TOF MS      |           |                  |           | MLPA              |           |                  |           |
|------------------|------------------|----|-------------------|-----------|------------------|-----------|-------------------|-----------|------------------|-----------|
| <i>SMN1:SMN2</i> | <i>SMN1:SMN2</i> | N  | <i>SMN1: SMN2</i> |           | <i>SMN1:SMN2</i> |           | <i>SMN1: SMN2</i> |           | <i>SMN1:SMN2</i> |           |
| E7               | E8               |    | E7                | E8        | E7               | E8        | E7                | E8        | E7               | E8        |
| 0:2              | 0:2              | 2  | 0.09±0.13         | 1.99±0.36 | 0.00±0.00        | 2.05±0.27 | 0.00±0.00         | 2.27±0.16 | 0.00±0.00        | 2.26±0.00 |
| 0:2              | 0:3              | 1  | 0.00              | 2.34      | 0.00             | 2.89      | 0.00±0.00         | 2.58±0.14 | 0.00±0.00        | 2.44±0.14 |
| 0:3              | 0:3              | 12 | 0.11±0.15         | 2.90±0.33 | 0.00±0.00        | 3.04±0.24 | 0.00±0.00         | 3.06±0.21 | 0.00±0.00        | 3.06±0.22 |
| 0:3              | 1:2              | 2  | 0.12±0.00         | 2.73±0.07 | 1.07±0.06        | 2.24±0.04 | 0.00±0.00         | 2.86±0.31 | 1.02±0.08        | 1.92±0.14 |
| 0:3              | 2:1              | 1  | 0.05              | 3.12      | 2.04             | 1.16      | 0.00±0.00         | 3.24±0.06 | 2.04±0.04        | 1.21±0.02 |
| 0:5              | 0:4              | 1  | 0.00              | 4.39      | 0.00             | 4.35      | 0.00±0.00         | 4.40±0.14 | 0.00±0.00        | 4.06±0.14 |
| 1:2              | 1:2              | 3  | 1.00±0.12         | 1.77±0.31 | 0.95±0.04        | 1.90±0.09 | 1.05±0.12         | 1.99±0.02 | 1.00±0.09        | 2.07±0.14 |
| 1:3              | 1:3              | 2  | 1.17±0.18         | 2.71±0.15 | 0.92±0.06        | 2.98±0.05 | 1.01±0.13         | 3.13±0.18 | 1.12±0.08        | 3.06±0.37 |
| 1:3              | 2:2              | 1  | 1.04              | 2.84      | 2.19             | 2.21      | 1.04±0.04         | 3.16±0.14 | 2.22±0.10        | 2.28±0.10 |
| 2:1              | 2:1              | 10 | 1.98±0.37         | 1.07±0.19 | 2.10±0.20        | 1.09±0.11 | 1.96±0.21         | 1.04±0.09 | 2.08±0.25        | 1.10±0.09 |
| 2:1              | 3:1              | 1  | 2.42              | 1.04      | 3.07             | 1.12      | 2.54±0.06         | 0.96±0.02 | 2.76±0.08        | 1.06±0.02 |
| 2:2              | 1:3              | 1  | 2.13              | 1.99      | 0.98             | 2.70      | 2.00±0.06         | 1.94±0.06 | 1.10±0.04        | 3.04±0.08 |
| 2:2              | 2:2              | 38 | 1.88±0.17         | 1.90±0.17 | 1.94±0.14        | 1.93±0.13 | 1.93±0.18         | 1.95±0.13 | 1.97±0.18        | 1.99±0.15 |
| 2:2              | 3:1              | 1  | 1.93              | 2.16      | 2.79             | 1.15      | 2.04±0.04         | 1.92±0.04 | 2.90±0.06        | 1.06±0.02 |
| 3:1              | 3:1              | 1  | 2.48              | 1.03      | 2.49             | 1.15      | 2.68±0.06         | 0.88±0.02 | 2.74±0.08        | 1.04±0.02 |

|       |     |    |      |      |      |      |           |           |           |           |
|-------|-----|----|------|------|------|------|-----------|-----------|-----------|-----------|
| 3:2   | 3:2 | 1  | 2.96 | 2.18 | 2.55 | 1.88 | 2.68±0.10 | 1.86±0.08 | 2.78±0.10 | 1.86±0.08 |
| Total |     | 78 |      |      |      |      |           |           |           |           |

MALDI-TOF MS, Matrix-assisted laser desorption/ionization time-of-flight mass spectrometry; MLPA, multiple ligation-dependent probe amplification; *SMN*, survival motor neuron.

**Table S8** The results of the samples with ambiguous copy numbers in two detection methods

| Sample ID      | Type    | MALDI-TOF MS              |      |                           |      | MLPA                      |      |                           |      |
|----------------|---------|---------------------------|------|---------------------------|------|---------------------------|------|---------------------------|------|
|                |         | <i>SMN1</i> : <i>SMN2</i> |      | <i>SMN1</i> : <i>SMN2</i> |      | <i>SMN1</i> : <i>SMN2</i> |      | <i>SMN1</i> : <i>SMN2</i> |      |
|                |         | E7                        | E8   | E7                        | E8   | E7                        | E8   | E7                        | E8   |
| Fig 3A/C, #061 | Normal  | 1.67                      | 1.83 | 1.93                      | 2.00 | 1.50                      | 1.66 | 1.52                      | 1.74 |
| Fig 3A, #072*  | Normal  | 2.53                      | 1.37 | 2.46                      | 1.17 | 1.62                      | 0.88 | 1.74                      | 0.96 |
| Fig 3A, #071*  | Normal  | 2.42                      | 1.04 | 3.07                      | 1.12 | 2.54                      | 0.96 | 2.76                      | 1.06 |
| Fig 3B/D, #021 | Patient | 0.00                      | 2.34 | 0.00                      | 2.89 | 0.00                      | 2.58 | 0.00                      | 2.44 |
| Fig 3B, #008   | Patient | 0.00                      | 3.08 | 0.00                      | 3.08 | 0.00                      | 3.46 | 0.00                      | 3.32 |
| Fig 3B, #006   | Patient | 0.00                      | 4.39 | 0.00                      | 4.35 | 0.00                      | 4.40 | 0.00                      | 4.06 |
| Fig 3D, #009   | Patient | 0.00                      | 3.22 | 0.00                      | 3.05 | 0.00                      | 3.28 | 0.00                      | 3.52 |

\*Potential gene conversion sample. The yellow-highlighted data indicates its placement within the ambiguous range (i.e., gray value); the data highlighted in green can serve as the viable alternative to the ambiguous copy number (yellow). MALDI-TOF MS, Matrix-assisted laser desorption/ionization time-of-flight mass spectrometry; MLPA: multiple ligation-dependent probe amplification; *SMN*: survival motor neuron.

## 2. Supplementary Figures

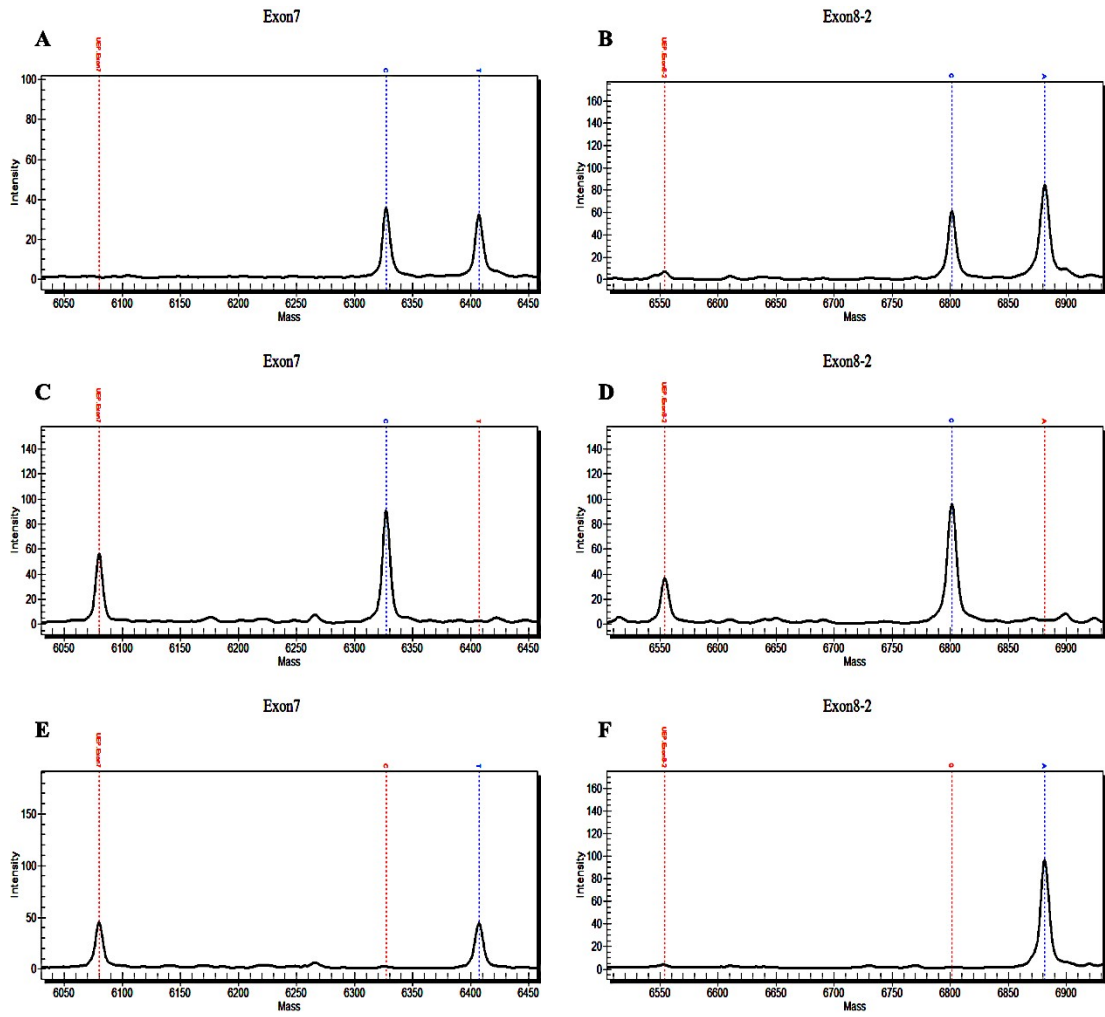

**Fig. S1** DNA mass spectrometry of *SMN* gene from MALDI-TOF MS (without competitive templates).

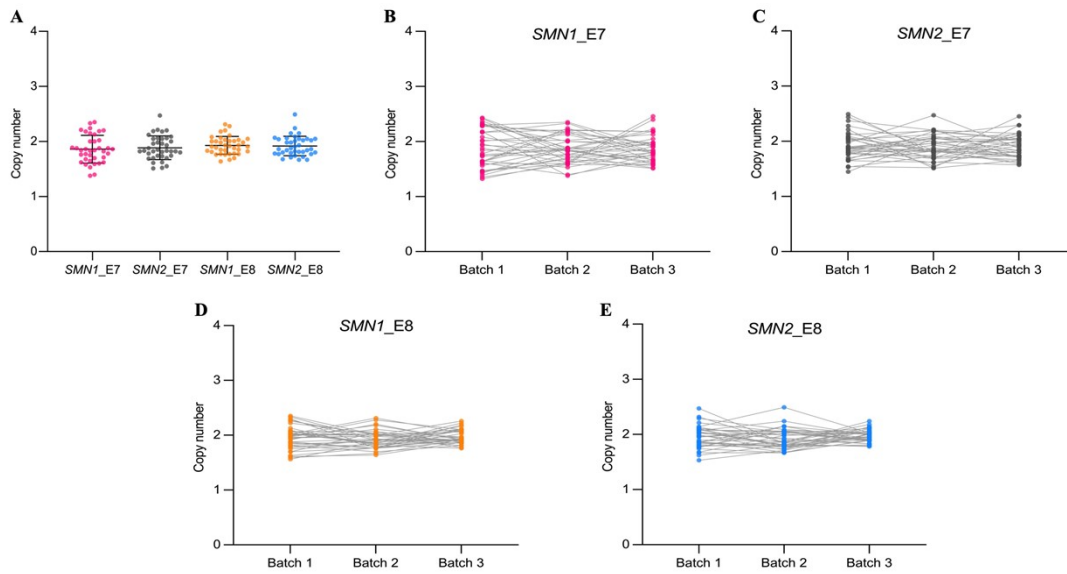

**Fig. S2** Samples with normal copy numbers were detected through MALDI-TOF MS. (A) The copy numbers of *SMN* E7 and E8 in normal samples (2N) were detected with 20 ng DNA (n = 38). Detection results of copy number variations in different batches of normal samples, including *SMN1* Exon7 (B), *SMN2* Exon7 (C), *SMN1* Exon8 (D), and *SMN2* Exon8 (E).

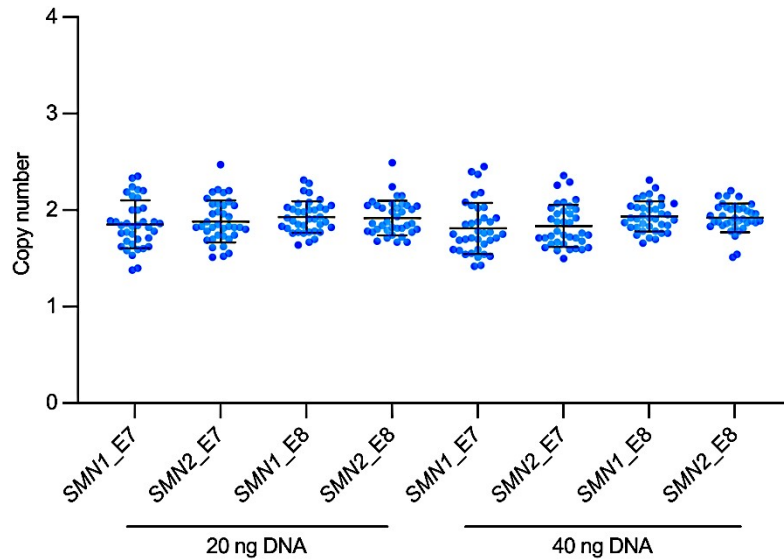

**Fig. S3** Samples with normal copy numbers for two different quantities of DNA were identified through MALDI-TOF MS.

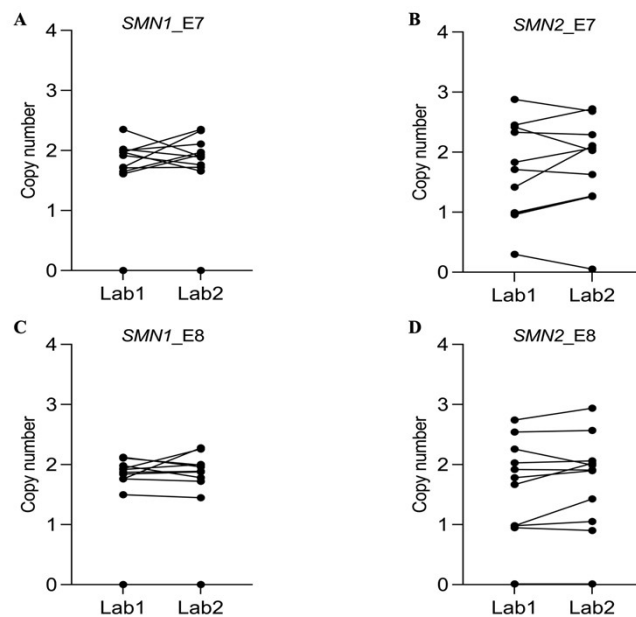

**Fig. S4** Quantitative assessment of *SMN* copy number via MALDI-TOF MS conducted in two independent laboratories. The copy numbers of *SMN1* E7 (A), *SMN2* E7 (B), *SMN1* Exon8 (C), and *SMN2* Exon8 (D) were detected with 20 ng DNA (n = 11).

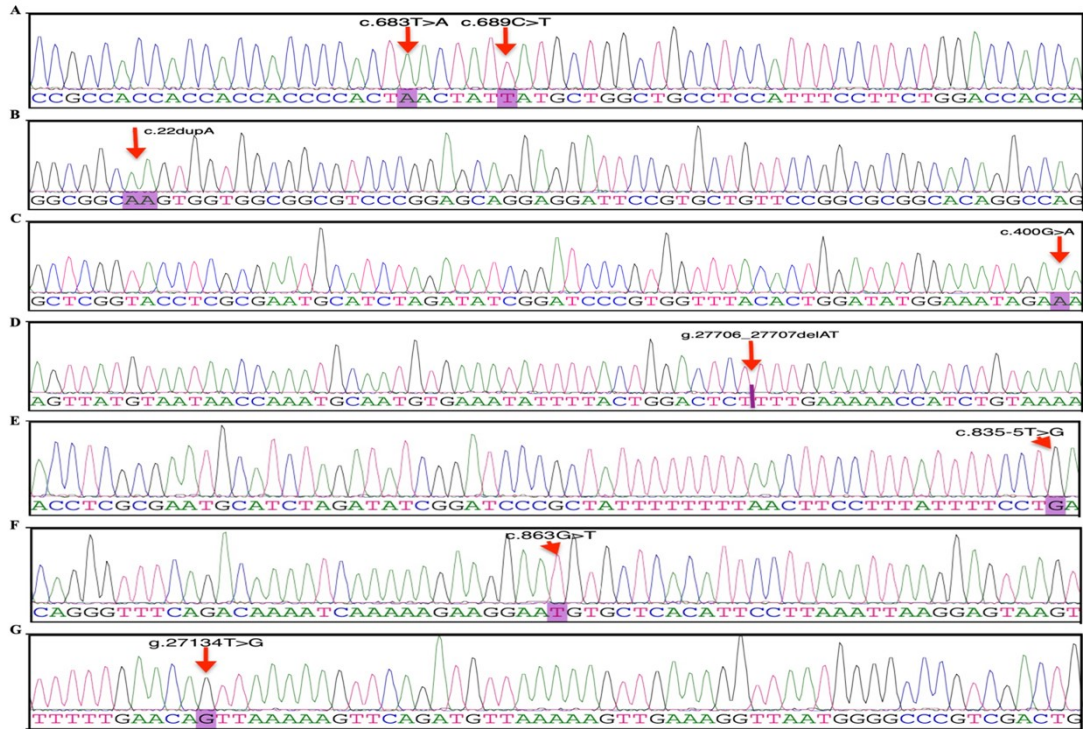

**Fig. S5** Representative Sanger sequencing peck maps of the DNA extracted from the agarose gel of PCR product that amplified from pathogenic and sequence variants.

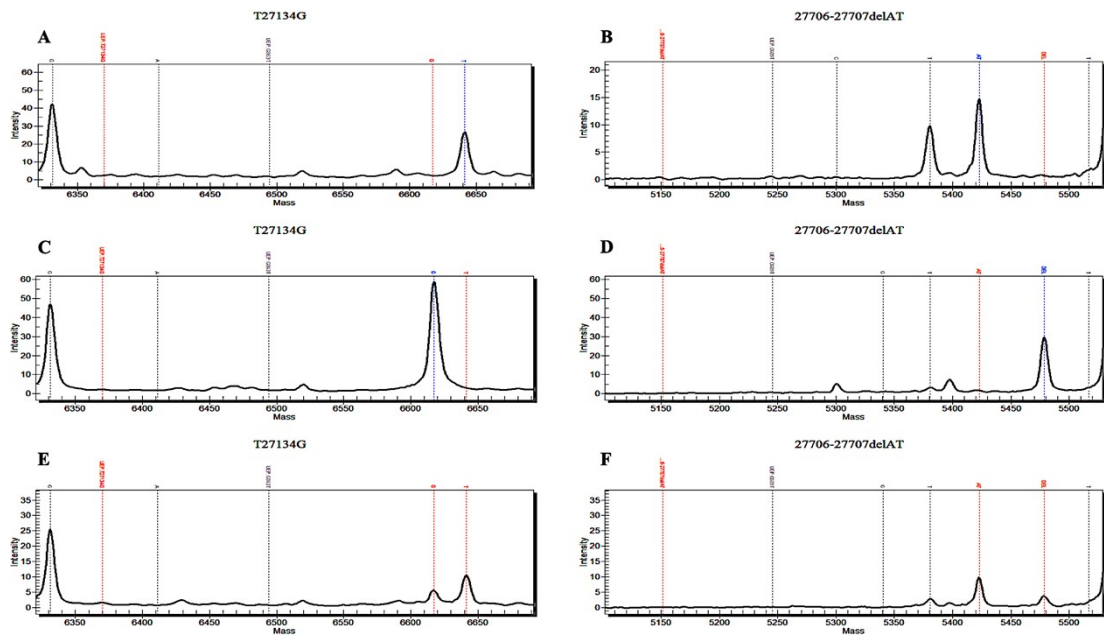

**Fig. S6** DNA mass spectrometry of detection of sequence variants in the *SMN1* gene from MALDI-TOF MS. T27134G represents g.27134T>G in intron 7 and 27706-27707delAT represents g.27706\_27707delAT in exon 8. The wild type (A, B) and the mutant type (C, D) of g.27134T>G and g.27706\_27707delAT detected via MALDI-TOF MS. (E, F) Concurrent mutations of g.27134T>G and g.27706\_27707delAT in one sample with 3 copies of *SMN1*.
